# Supplementary material for: Spread of West Nile Virus and Usutu Virus in the German Bird Population, 2019–2020
Source: Microorganisms. 2022 Apr 12;10(4):807. doi: 10.3390/microorganisms10040807 (PMC9030481; doi:10.3390/microorganisms10040807)
Supplement: Supplementary file 1 [file microorganisms-10-00807-s001.zip › Supplemental Tables S1 _ S10 final 11-04-2022.xlsx]

## Sheet: Suppl_TableS1
	Supplemental Table S1: USUV-specific primers used in this study.
	Primer	Sequence 5’ -3 ‘	Position *
	USUV_F_946	CTT GTG GCG CCT GCT T	946
	USUV_R_1441	CCC AGC CTG TGA TGC TCC TAG	1441
	USUV_F_1269	GGG CAA TGG CTG TGG ACT ATT TGG C	1269
	USUV_R_1945	GCA AGG TCC ATC AGA TCC CGT GTA CTG	1945
	USUV_F_1800	CAA GCT CAC ATC TGG TCA TCT C	1800
	USUV_R_2287	CTC CTC CAA AGA CCT GAT GTA C	2287
			KU664608*
	* according to GenBank Accession number KU664608

## Sheet: Suppl_TableS2
	Supplemental Table S2: Comparative analysis of the WNV antibody neutralization titers in positive reference sera by using two different WNV lineage 2 strains in VNT .
			VNT with WNV lineage 2:
	FLI ID number	Species	strain Austria antibody titer (ND50)	strain Germany antibody titer (ND50)
	OM 8	Rabbit	1920	1920
	TW 300	Rabbit	80	120
	Rh 10	Horse	40	40
	Rh 11	Horse	60	80
	Rh 14	Horse	160	240
	P 2025	Horse	40	40
	E-Fl 238	Duck	30	30
	ED-I-130/19	Horse	240	240
	ED-I-137/19	Horse	80	120
	ED-I-210/19	Horse	320	480

## Sheet: Suppl_TableS3
	Supplemental Table S3: No differentiation between WNV and USUV by neutralization assays from wild bird blood samples was possible in regions A–C from the year 2019 and 2020.
		Therefore these serum samples from the birds were excluded from the calculation of seroprevalences and were classified as an infection by an "undetermined flavivirus".
	Year	Region	ID-Number	Order	Common name	Scientific name	Migration pattern	Housing	WNV antibody titer (ND50)	USUV antibody titer (ND50)
	2019	A	M 1765	Passeriformes	Carrion Crow	Corvus corone	P, S	wild	15	20
			M 1784	Charadriiformes	Black-headed Gull	Larus ridibundus	R, P, S	wild	30	15
			M 2179	Columbiformes	Common Wood Pigeon	Columba palumbus	R, P, S	wild	20	10
			M 1909	Columbiformes	Common Wood Pigeon	Columba palumbus	R, P, S	wild	40	80
		B	M 1787	Accipitriformes	Common Buzzard	Buteo buteo	R, P, S	wild	15	10
			M 1827	Passeriformes	Eurasian Blackbird	Turdus merula	R, P	wild	40	30
			M 2038	Passeriformes	Eurasian Jay	Garrulus glandarius	R, P	wild	10	20
			M 2063	Accipitriformes	Common Buzzard	Buteo buteo	R, P, S	wild	15	30
		C	M 1471	Passeriformes	House Sparrow	Passer domesticus	R	wild	10	10
			M 1536	Accipitriformes	Common Buzzard	Buteo buteo	R, P, S	wild	20	20
			M 1603	Columbiformes	Feral Pigeon	Columba livia f. domestica	R, (P)	wild	20	10
			M 2307	Passeriformes	Eurasian Blackbird	Turdus merula	R, P	wild	20	40
			M 2152	Columbiformes	Common Wood Pigeon	Columba palumbus	R, P, S	wild	30	10
	2020	A	M 2230	Passeriformes	Common Magpie	Pica pica	R	wild	10	10
			M 3287	Passeriformes	Song trush	Turdus philomelos	R, S	wild	30	40
		B	M 2859	Columbiformes	Common Wood Pigeon	Columba palumbus	R, P, S	wild	20	20
			M 2894	Falconiformes	European Kestrel	Falco tinnunculus	R, P, S	wild	40	30
			M 2974	Columbiformes	Common Wood Pigeon	Columba palumbus	R, P, S	wild	60	30
			M 3719	Columbiformes	Common Wood Pigeon	Columba palumbus	R, P, S	wild	30	80
			M 3739	Columbiformes	Common Wood Pigeon	Columba palumbus	R, P, S	wild	30	10
		C	M 2437	Pelecaniformes	Grey Heron	Ardea cinerea	R, P, S	wild	15	40
			M 2499	Falconiformes	European Kestrel	Falco tinnunculus	R, P, S	wild	10	15
			M 3573	Passeriformes	Eurasian Blackbird	Turdus merula	R, P	wild	15	15
			M 3583	Passeriformes	Eurasian Blackbird	Turdus merula	R, P	wild	15	10
			M 3650	Passeriformes	Eurasian Blackbird	Turdus merula	R, P	wild	30	40
			M 3651	Columbiformes	Common Wood Pigeon	Columba palumbus	R, P, S	wild	40	40
			M 2659	Columbiformes	Common Wood Pigeon	Columba palumbus	R, P, S	wild	30	60
			M 2670	Columbiformes	Common Wood Pigeon	Columba palumbus	R, P, S	wild	40	30
			M 2694	Columbiformes	Common Wood Pigeon	Columba palumbus	R, P, S	wild	40	40
			M 4685	Accipitriformes	Rüppell`s Vulture	Gyps rueppelli	zoo bird	captive	10	30
			R = resident species, P = partial migrants, S = short-distance migrants, L = long-distance migrants

## Sheet: Suppl_TableS4
	Supplemental Table S4: Detailed register of the tested blood samples by bird orders and species from region A (northern and central-western part of Germany) from 2019 and 2020.
	Region	Year	Order	Common name	Scientific name	Migration pattern	Number samples tested
	A	2019	Accipitriformes	White-tailed Eagle	Haliaeetus albicilla	R, P	29
			Accipitriformes	Osprey	Pandion haliaetus	L	8
			Accipitriformes	Common Buzzard	Buteo buteo	R, P, S	19
			Accipitriformes	Eurasian Sparrowhawk	Accipiter nisus	R, P, S	3
			Accipitriformes	Northern Goshawk	Accipiter gentilis	R, P	2
			Anseriformes	Northern Mallard Duck	Anas platyrhynchos	R, P, S	18
			Anseriformes	Greylag Goose	Anser anser	R, P, S	2
			Anseriformes	Mute Swan	Cygnus olor	R, P, S	1
			Anseriformes	Common Eider	Somateria mollissima	R, S	1
			Anseriformes	Eurasian Wigeon	Anas penelope	S	1
			Apodiformes	Common Swift	Apus apus	L	6
			Caprimulgiformes	European Nightjar	Caprimulgus europaeus	L	1
			Charadriiformes	Black-headed Gull	Larus ridibundus	R, P, S	8
			Charadriiformes	Common Gull	Larus canus	R, S	1
			Charadriiformes	Lesser Black-backed Gull	Larus fuscus	P, S, L	3
			Charadriiformes	Eurasian Oystercatcher	Haematopus ostralegus	S	1
			Charadriiformes	Great Black-backed Gull	Larus marinus	R, S	1
			Charadriiformes	European Herring Gull	Larus argentatus	R, S	17
			Charadriiformes	Eurasian Woodcock	Scolopax rusticola	R, S	7
			Charadriiformes	Common Murre	Uria aalge	R, P, S	2
			Columbiformes	Common Wood Pigeon	Columba palumbus	R, P, S	42
			Columbiformes	Feral Pigeon	Columba livia f. domestica	R, (P)	13
			Columbiformes	Eurasian Collared Dove	Streptopelia decaocto	R, (P)	3
			Falconiformes	European Kestrel	Falco tinnunculus	R, P, S	5
			Falconiformes	Peregrine Falcon	Falco peregrinus	R, P	4
			Galliformes	Common Pheasant	Phasianus colchicus	R	2
			Gruiformes	Eurasian coot	Fulica atra	R	2
			Gruiformes	Common Moorhen	Gallinula chloropus	R, S	1
			Passeriformes	Eurasian Blackbird	Turdus merula	R, P	28
			Passeriformes	Common Chaffinch	Fringilla coelebs	R, P	1
			Passeriformes	Blue Tit	Cyanistes caeruleus	R, (S)	1
			Passeriformes	Western Jackdaw	Coloeus monedula	S	4
			Passeriformes	Eurasian Jay	Garrulus glandarius	R, P	5
			Passeriformes	Common Magpie	Pica pica	R	4
			Passeriformes	European Greenfinch	Carduelis chloris	S	1
			Passeriformes	Great Tit	Parus major	R, (P)	3
			Passeriformes	House Sparrow	Passer domesticus	R	7
			Passeriformes	Northern House Martin	Delichon urbicum	L	6
			Passeriformes	Eurasian Blackcap	Sylvia atricapilla	S, L	2
			Passeriformes	Carrion Crow	Corvus corone	R, (S)	15
			Passeriformes	Barn Swallow	Hirundo rustica	L	5
			Passeriformes	Coal Tit	Parus ater	R, S	1
			Passeriformes	Common Starling	Sturnus vulgaris	R, P, S	5
			Passeriformes	Rook	Corvus frugilegus	R, (P, S)	2
			Passeriformes	Song Thrush	Turdus philomelos	R, S	4
			Pelecaniformes	Grey Heron	Ardea cinerea	R, P, S	5
			Pelicaniformes	Northern Gannet	Morus bassanus	S, L	1
			Piciformes	Great Spotted Woodpecker	Dendrocopos major	R, P, (S)	3
			Piciformes	Eurasian Green Woodpecker	Picus viridis	R, (P)	2
			Piciformes	Middle Spotted Woodpecker	Dendrocopos medius	R	1
			Procellariiformes	Nothern Fulmar	Fulmarus glacialis	R	1
			Strigiformes	Common Barn Owl	Tyto alba	R, P	6
			Strigiformes	Eurasian Eagle Owl	Bubo bubo	R	2
			Strigiformes	Eurasian Tawny Owl	Strix aluco	R	2
			Strigiformes	Northern Long-eared Owl	Asio otus	R, P, S	2
			Suliformes	Great Cormorant	Phalacrocorax carbo	R, S	1
		in total					323
	A	2020	Accipitriformes	Common Buzzard	Buteo buteo	R, P, S	21
			Accipitriformes	Eurasian Sparrowhawk	Accipiter nisus	R, P, S	3
			Accipitriformes	Northern Goshawk	Accipiter gentilis	R, P	1
			Accipitriformes	Osprey	Pandion haliaetus	L	7
			Accipitriformes	Red Kite	Milvus milvus	(R), S	8
			Accipitriformes	White-tailed Eagle	Haliaeetus albicilla	R, P	27
			Anseriformes	Mute Swan	Cygnus olor	R, P, S	1
			Anseriformes	Barnacle Goose	Branta leucopsis	S	1
			Anseriformes	Egyptian Goose	Alopochen aegyptiacus	R (neozoa)	1
			Anseriformes	White-fronted Goose	Anser albifrons	S, (L)	1
			Anseriformes	Northern Mallard Duck	Anas platyrhynchos	R, P, S	123
			Charadriiformes	Eurasian Woodcock	Scolopax rusticola	R, S	4
			Charadriiformes	Eurasian Oystercatcher	Haematopus ostralegus	S	1
			Charadriiformes	Black-headed Gull	Larus ridibundus	R, P, S	3
			Charadriiformes	European Herring Gull	Larus argentatus	R, S	3
			Charadriiformes	Eurasian Whimbrel	Numenius phaeopus	(S), L	1
			Columbiformes	Common Wood Pigeon	Columba palumbus	R, P, S	42
			Columbiformes	Feral Pigeon	Columba livia f. domestica	R, (P)	9
			Columbiformes	Eurasian Collared Dove	Streptopelia decaocto	R, (P)	2
			Falconiformes	Peregrine Falcon	Falco peregrinus	R, P	2
			Falconiformes	European Kestrel	Falco tinnunculus	R, P, S	5
			Falconiformes	Gyrfalcon	Falco rusticolus	zoo bird	1
			Falconiformes	Merlin	Falco columbarius	zoo bird	1
			Gaviiformes	Black-throated Loon	Gavia arctica	S	1
			Gruiformes	Common Moorhen	Gallinula chloropus	R, S	2
			Passeriformes	Eurasian Blackbird	Turdus merula	R, P	29
			Passeriformes	Eurasian Jay	Garrulus glandarius	R, P	4
			Passeriformes	Western Jackdaw	Coloeus monedula	S	3
			Passeriformes	Dunnock	Prunella modularis	S	2
			Passeriformes	Blue Tit	Cyanistes caeruleus	R	1
			Passeriformes	Carrion Crow	Corvus corone	R, (S)	13
			Passeriformes	Bohemian Waxwing	Bombycilla garrulus	S	1
			Passeriformes	Common Starling	Sturnus vulgaris	R, P, S	5
			Passeriformes	Eurasian Tree Sparrow	Passer montanus	R	1
			Passeriformes	Barn Swallow	Hirundo rustica	L	1
			Passeriformes	Song Thrush	Turdus philomelos	R, S	4
			Passeriformes	Fieldfare	Turdus pilaris	S	2
			Passeriformes	Common Chaffinch	Fringilla coelebs	R, P	2
			Passeriformes	Common Magpie	Pica pica	R	1
			Passeriformes	Eurasian Bullfinch	Pyrrhula pyrrhula	R, P	1
			Passeriformes	Great Tit	Parus major	R, (P)	4
			Passeriformes	House Sparrow	Passer domesticus	R	1
			Passeriformes	Rook	Corvus frugilegus	R, P, S	2
			Passeriformes	Redwing	Turdus iliacus	S	1
			Pelecaniformes	Grey Heron	Ardea cinerea	R, P, S	3
			Piciformes	Great Spotted Woodpecker	Dendrocopos major	R, P, (S)	5
			Piciformes	Eurasian Green Woodpecker	Picus viridis	R, (P)	3
			Strigiformes	Great Grey Owl	Strix nebulosa	zoo bird	1
			Strigiformes	Common Barn Owl	Tyto alba	R, P	8
			Strigiformes	Eurasian Tawny Owl	Strix aluco	R	3
			Strigiformes	Eurasian Eagle Owl	Bubo bubo	R	2
			Strigiformes	Northern Long-eared Owl	Asio otus	R, P, S	9
		in total					383
			R = resident species, P = partial migrants, S = short-distance migrants, L = long-distance migrants
			n.d. not determined

## Sheet: Suppl_TableS5
	Supplemental Table S5: Detailed register of the tested blood samples by bird orders and species from region B (eastern and central-eastern part of Germany) from 2019 and 2020.
	Region	Year	Order	Common name	Scientific name	Migration pattern	Number samples tested
	B	2019	Accipitriformes	Common Buzzard	Buteo buteo	R, P, S	10
			Accipitriformes	Northern Goshawk	Accipiter gentilis	R, P	18
			Accipitriformes	Osprey	Pandion haliaetus	L	4
			Accipitriformes	Western Marsh Harrier	Circus aeruginosus	L	1
			Accipitriformes	White-tailed Eagle	Haliaeetus albicilla	R, P	14
			Accipitriformes	Black Kite	Milvus migrans	L	1
			Accipitriformes	Eurasian Sparrowhawk	Accipiter nisus	R, P, S	4
			Anseriformes	Mute Swan	Cygnus olor	R, P, S	21
			Anseriformes	Northern Mallard Duck	Anas platyrhynchos	R, P, S	3
			Anseriformes	Bean Goose	Anser fabalis	S, L	1
			Apodiformes	Common Swift	Apus apus	L	3
			Charadriiformes	Eurasian Woodcock	Scolopax rusticola	R, S	6
			Charadriiformes	Black-headed Gull	Larus ridibundus	R, P, S	1
			Charadriiformes	Common Gull	Larus canus	R, S	1
			Ciconiiformes	White Stork	Ciconia ciconia	L	3
			Columbiformes	Common Wood Pigeon	Columba palumbus	R, P, S	19
			Columbiformes	Feral Pigeon	Columba livia f. domestica	R, (P)	3
			Columbiformes	Pigeon	Columba sp.	R, (P)	8
			Coraciiformes	Common Kingfisher	Alcedo atthis	R, S	2
			Falconiformes	European Kestrel	Falco tinnunculus	R, P, S	1
			Passeriformes	Eurasian Jay	Garrulus glandarius	R, P	3
			Passeriformes	Common Raven	Corvus corax	R	2
			Passeriformes	Eurasian Blackbird	Turdus merula	R, P	5
			Passeriformes	Song Thrush	Turdus philomelos	R, S	1
			Passeriformes	Hooded Crow	Corvus cornix	R, (S)	13
			Passeriformes	Common Starling	Sturnus vulgaris	R, P, S	1
			Pelecaniformes	Grey Heron	Ardea cinerea	R, P, S	5
			Piciformes	Middle Spotted Woodpecker	Dendrocopos medius	R	1
			Strigiformes	Northern Long-eared Owl	Asio otus	R, P, S	3
			Strigiformes	Eurasian Tawny Owl	Strix aluco	R	6
			Unknown	Unknown spezies	n.d.	n.d.	1
		in total					165
	B	2020	Accipitriformes	Northern Goshawk	Accipiter gentilis	R, P	31
			Accipitriformes	Common Buzzard	Buteo buteo	R, P, S	19
			Accipitriformes	White-tailed Eagle	Haliaeetus albicilla	R, P	7
			Accipitriformes	Red Kite	Milvus milvus	(R), S	1
			Accipitriformes	Eurasian Sparrowhawk	Accipiter nisus	R, P, S	6
			Accipitriformes	Montagu's Harrier	Circus pygargus	L	3
			Anseriformes	Mute Swan	Cygnus olor	R, P, S	27
			Anseriformes	Canada Goose	Branta canadensis	R (neozoa)	1
			Anseriformes	Northern Mallard Duck	Anas platyrhynchos	R, P, S	3
			Apodiformes	Common Swift	Apus apus	L	2
			Charadriiformes	Eurasian Woodcock	Scolopax rusticola	R, S	5
			Ciconiiformes	White Stork	Ciconia ciconia	L	1
			Columbiformes	Feral Pigeon	Columba livia f. domestica	R, (P)	9
			Columbiformes	Common Wood Pigeon	Columba palumbus	R, P, S	60
			Columbiformes	Pigeon	Columba sp.	R, (P)	10
			Falconiformes	European Kestrel	Falco tinnunculus	R, P, S	11
			Falconiformes	Peregrine Falcon	Falco peregrinus	R, P	1
			Falconiformes	Eurasian Hobby	Falco subbuteo	L	1
			Passeriformes	Eurasian Blackbird	Turdus merula	R, P	3
			Passeriformes	Thrush	Turdus sp.	S, L	1
			Passeriformes	Eurasian Jay	Garrulus glandarius	R, P	4
			Passeriformes	Common Chaffinch	Fringilla coelebs	R, P	1
			Passeriformes	Common Magpie	Pica pica	R	3
			Passeriformes	Grosbeak	Coccothraustes coccothraustes	S, L	1
			Passeriformes	Common Raven	Corvus corax	R	2
			Passeriformes	Great Tit	Parus major	R, (P)	1
			Passeriformes	Common House Martin	Delichon urbicum	L	1
			Passeriformes	Hooded Crow	Corvus cornix	R, (S)	32
			Passeriformes	Rook	Corvus frugilegus	R, (P, S)	1
			Passeriformes	Common Starling	Sturnus vulgaris	R, P, S	2
			Pelicaniformes	Grey Heron	Ardea cinerea	R, P, S	2
			Pelicaniformes	Great White Pelican	Pelecanus onocrotalus	zoo bird	1
			Piciformes	Great Spotted Woodpecker	Dendrocopos major	R, P, (S)	5
			Piciformes	Black Woodpecker	Dryocopus martius		1
			Strigiformes	Common Barn Owl	Tyto alba	R, P	2
			Strigiformes	Eurasian Tawny Owl	Strix aluco	R	2
			Strigiformes	Northern Long-eared Owl	Asio otus	R, P, S	8
		in total					271
			R = resident species, P = partial migrants, S = short-distance migrants, L = long-distance migrants
			n.d. not determined

## Sheet: Suppl_TableS6
	Supplemental Table S6: Detailed register of the tested blood samples by bird orders and species from region C (central and southern part of Germany) from 2019 and 2020.
	Region	Year	Order	Common name	Scientific name	Migration pattern	Number samples tested
	C	2019	Accipitriformes	Buzzard sp.	Buteo sp.	R, P, S	1
			Accipitriformes	White-tailed Eagle	Haliaeetus albicilla	R, P	12
			Accipitriformes	Osprey	Pandion haliaetus	L	1
			Accipitriformes	Griffon Vulture	Gyps fulvus	zoo bird	4
			Accipitriformes	Northern Goshawk	Accipiter gentilis	R, P	8
			Accipitriformes	Common Buzzard	Buteo buteo	R, P, S	34
			Accipitriformes	Hooded Vulture	Necrosyrtes monachus	zoo bird	1
			Accipitriformes	Rough-legged Buzzard	Buteo lagopus	zoo bird	1
			Accipitriformes	Steller's Sea Eagle	Haliaeetus pelagicus	zoo bird	2
			Accipitriformes	Red Kite	Milvus milvus	(R), S	5
			Accipitriformes	African Fish Eagle	Haliaeetus vocifer	zoo bird	3
			Accipitriformes	Red-tailed Hawk	Buteo jamaicensis)	zoo bird	1
			Accipitriformes	Eurasian Sparrowhawk	Accipiter nisus	R, P, S	8
			Accipitriformes	Bald Eagle	Haliaeetus leucocephalus	zoo bird	5
			Accipitriformes	Steppe Eagle	Aquila nipalensis	zoo bird	4
			Accipitriformes	Harris’s Hawk	Parabuteo unicinctus	zoo bird	14
			Accipitriformes	European Honey Buzzard	Pernis apivorus	L	3
			Accipitriformes	Bearded Vulture	Gypaetus barbatus	zoo bird	1
			Accipitriformes	Long-legged Buzzard	Buteo rufinus	zoo bird	1
			Accipitriformes	Eastern Imperial Eagle	Aquila heliaca	zoo bird	1
			Accipitriformes	Ferruginous Hawk	Buteo regalis	zoo bird	2
			Accipitriformes	King Vulture	Sarcoramphus papa	zoo bird	1
			Accipitriformes	Cinereous Vulture	Aegypius monachus	zoo bird	2
			Accipitriformes	Rüppell's Vulture	Gyps rueppelli	zoo bird	1
			Accipitriformes	Golden Eagle	Aquila chrysaetos	zoo bird	1
			Accipitriformes	Turkey Vulture	Cathartes aura	zoo bird	1
			Accipitriformes	Western Marsh Harrier	Circus aeruginosus	L	1
			Anseriformes	Northern Mallard Duck	Anas platyrhynchos	R, P, S	2
			Anseriformes	Greylag Goose	Anser anser	R, P, S	1
			Anseriformes	Mute Swan	Cygnus olor	R, P, S	3
			Anseriformes	Egyptian Goose	Alopochen aegyptiacus	R (neozoa)	2
			Apodiformes	Common Swift	Apus apus	L	5
			Charadriiformes	Dunlin	Calidris alpina	S, L	1
			Charadriiformes	Eurasian Woodcock	Scolopax rusticola	R, S	1
			Ciconiiformes	White Stork	Ciconia ciconia	L	2
			Ciconiiformes	Black Stork	Ciconia nigra	L	1
			Columbiformes	Common Wood Pigeon	Columba palumbus	R, P, S	42
			Columbiformes	Feral Pigeon	Columba livia f. domestica	R, (P)	34
			Columbiformes	Eurasian Collared Dove	Streptopelia decaocto	R, (P)	5
			Cuculiformes	Common Cuckoo	Cuculus canorus	L	1
			Falconiformes	Eurasian Hobby	Falco subbuteo	L	3
			Falconiformes	Falcon sp.	Falco sp.	n.d.	1
			Falconiformes	Laggar Falcon	Falco jugger	zoo bird	1
			Falconiformes	European Kestrel	Falco tinnunculus	R, P, S	36
			Falconiformes	Merlin	Falco columbarius	zoo bird	1
			Falconiformes	Peregrine Falcon	Falco peregrinus	R, P	11
			Falconiformes	Southern Crested Caracara	Caracara plancus	zoo bird	3
			Falconiformes	Lanner Falcon	Falco biarmicus	zoo bird	2
			Falconiformes	Saker Falcon	Falco cherrug	zoo bird	2
			Falconiformes	Striated Caracara	Phalcoboenus australis	zoo bird	1
			Galliformes	King Quail	Coturnix chinensis	zoo bird	1
			Galliformes	Common Quail	Coturnix coturnix	L	1
			Galliformes	Grey Rartridge	Perdix perdix	R	1
			Galliformes	Common Pheasant	Phasianus colchicus	R	2
			Gruiformes	Common Moorhen	Gallinula chloropus	R, S	2
			Passeriformes	Eurasian Blackbird	Turdus merula	R, P	29
			Passeriformes	Blue Tit	Cyanistes caeruleus	R	2
			Passeriformes	Eurasian Jay	Garrulus glandarius	R, P	6
			Passeriformes	Trush sp.	Turdus sp.	S, L	4
			Passeriformes	Common Magpie	Pica pica	R	6
			Passeriformes	Black Redstart	Phoenicurus ochruros	P, S	2
			Passeriformes	House Sparrow	Passer domesticus	R	7
			Passeriformes	Grosbeak	Coccothraustes coccothraustes	S	4
			Passeriformes	Crow	Corvus sp.	n.d.	5
			Passeriformes	Great Tit	Parus major	R, (P)	3
			Passeriformes	Eurasian Blackcap	Sylvia atricapilla	S, L	3
			Passeriformes	Common House Martin	Delichon urbicum	L	2
			Passeriformes	Carrion Crow	Corvus corone	R, (S)	23
			Passeriformes	Barn Swallow	Hirundo rustica	L	5
			Passeriformes	European Robin	Erithacus rubecula	P	2
			Passeriformes	Common Starling	Sturnus vulgaris	R, P, S	4
			Passeriformes	Song Thrush	Turdus philomelos	R, S	4
			Passeriformes	Yellowhammer	Emberiza citrinella	R, P, S	1
			Passeriformes	European Greenfinch	Carduelis chloris	S	1
			Pelecaniformes	Grey Heron	Ardea cinerea	R, P, S	6
			Piciformes	Eurasian Green Woodpecker	Picus viridis	R, (P)	4
			Piciformes	Black Woodpecker	Dryocopus martius	R, P	2
			Piciformes	Great Spotted Woodpecker	Dendrocopos major	R, P, (S)	5
			Piciformes	Woodspecker sp.	Picidae sp.	n.d.	2
			Podicipediformes	Great Crested Grebe	Podiceps cristatus	R	1
			Psittaciformes	Red-and-green Macaw	Ara chloroptera	zoo bird	1
			Strigiformes	Ural owl	Strix uralensis	zoo bird	3
			Strigiformes	Great Grey Owl	Strix nebulosa	zoo bird	4
			Strigiformes	Snowy Owl	Bubo scandiacus	zoo bird	7
			Strigiformes	Eurasian Eagle Owl	Bubo bubo sibiricus	zoo bird	1
			Strigiformes	Northern Hawk Owl	Surnia ulula	zoo bird	1
			Strigiformes	Great Horned Owl	Bubo virginianus	zoo bird	2
			Strigiformes	Eurasian Eagle Owl	Bubo bubo	R	10
			Strigiformes	Little Owl	Athene noctua	R	6
			Strigiformes	Eurasian Tawny Owl	Strix aluco	R	12
			Strigiformes	Northern Long-eared Owl	Asio otus	R, P, S	5
			Strigiformes	Spotted Eagle-owl	Bubo africanus	zoo bird	5
			Strigiformes	Common Barn Owl	Tyto alba	R, P	9
			Unknown	Unknown spezies	n.d.	n.d.	3
		in total					489
	C	2020	Accipitriformes	Buzzard sp.	Buteo sp.	R, P, S	1
			Accipitriformes	Bateleur Eagle	Terathopius ecaudatus	zoo bird	1
			Accipitriformes	Bearded Vulture	Gypaetus barbatus	zoo bird	1
			Accipitriformes	Northern Goshawk	Accipiter gentilis	R, P	10
			Accipitriformes	Crowned eagle	Stephanoaetus coronatus	zoo bird	1
			Accipitriformes	Common Buzzard	Buteo buteo	R, P, S	33
			Accipitriformes	Eurasian Sparrowhawk	Accipiter nisus	R, P, S	7
			Accipitriformes	White-tailed Eagle	Haliaeetus albicilla	R, P	6
			Accipitriformes	Black Kite	Milvus migrans	L	1
			Accipitriformes	Red-tailed Hawk	Buteo jamaicensis)	zoo bird	1
			Accipitriformes	Western Marsh Harrier	Circus aeruginosus	L	1
			Accipitriformes	Golden Eagle	Aquila chrysaetos	zoo bird	4
			Accipitriformes	Steppe Eagle	Aquila nipalensis	zoo bird	7
			Accipitriformes	Bald Eagle	Haliaeetus leucocephalus	zoo bird	9
			Accipitriformes	Wahlberg's Eagle	Hieraaetus wahlbergi	zoo bird	3
			Accipitriformes	Harris’s Hawk	Parabuteo unicinctus	zoo bird	7
			Accipitriformes	European Honey Buzzard	Pernis apivorus	L	1
			Accipitriformes	White-backed Vulture	Gyps africanus	zoo bird	1
			Accipitriformes	Long-legged Buzzard	Buteo rufinus	zoo bird	2
			Accipitriformes	Eastern Imperial Eagle	Aquila heliaca	zoo bird	1
			Accipitriformes	Griffon Vulture	Gyps fulvus	zoo bird	3
			Accipitriformes	Ferruginous Hawk	Buteo regalis	zoo bird	1
			Accipitriformes	Cinereous Vulture	Aegypius monachus	zoo bird	2
			Accipitriformes	Red Kite	Milvus milvus	(R), S	2
			Accipitriformes	African Fish Eagle	Haliaeetus vocifer	zoo bird	2
			Accipitriformes	Rüppell's Vulture	Gyps rueppelli	zoo bird	1
			Accipitriformes	Turkey Vulture	Cathartes aura	zoo bird	1
			Accipitriformes	Montagu's Harrier	Circus pygargus	L	9
			Anseriformes	Northern Mallard Duck	Anas platyrhynchos	R, P, S	6
			Anseriformes	Anserinae	Anserinae	n.d.	1
			Anseriformes	Egyptian Goose	Alopochen aegyptiacus	R (neozoa)	1
			Anseriformes	Mute Swan	Cygnus olor	R, P, S	2
			Anseriformes	Swan sp.	Cygnus sp.	n.d.	1
			Apodiformes	Common Swift	Apus apus	L	3
			Charadriiformes	Northern Lapwing	Vanellus vanellus	R, S	1
			Charadriiformes	Eurasian Woodcock	Scolopax rusticola	R, S	1
			Ciconiiformes	White Stork	Ciconia ciconia	L	3
			Columbiformes	Feral Pigeon	Columba livia f. domestica	R, (P)	1
			Columbiformes	Common Wood Pigeon	Columba palumbus	R, P, S	165
			Columbiformes	Feral Pigeon	Columba livia f. domestica	R, (P)	37
			Columbiformes	Pigeon	Columba sp.	n.d.	6
			Columbiformes	Eurasian Collared Dove	Streptopelia decaocto	R, (P)	5
			Falconiformes	Gyrfalcon x Lanner Falcon	n.d.	zoo bird	2
			Falconiformes	Eurasian Hobby	Falco subbuteo	L	3
			Falconiformes	Barbary falcon	Falco peregrinus pelegrinoides	zoo bird	1
			Falconiformes	Laggar Falcon	Falco jugger	zoo bird	2
			Falconiformes	Lanner Falcon	Falco biarmicus	zoo bird	1
			Falconiformes	Saker Falcon	Falco cherrug	zoo bird	9
			Falconiformes	European Kestrel	Falco tinnunculus	R, P, S	38
			Falconiformes	Peregrine Falcon	Falco peregrinus	R, P	14
			Falconiformes	Southern Crested Caracara	Caracara plancus	zoo bird	2
			Falconiformes	Striated Caracara	Phalcoboenus australis	zoo bird	1
			Galliformes	Grey Rartridge	Perdix perdix	R	1
			Galliformes	Chicken	Gallus gallus domesticus	zoo bird	2
			Gruiformes	Common Moorhen	Gallinula chloropus	R, S	1
			Passeriformes	Eurasian Blackbird	Turdus merula	R, P	37
			Passeriformes	Common Chaffinch	Fringilla coelebs	R, P	2
			Passeriformes	Blue Tit	Cyanistes caeruleus	R	4
			Passeriformes	Trush sp.	Turdus sp.	S, L	5
			Passeriformes	Eurasian Jay	Garrulus glandarius	R, P	2
			Passeriformes	Common Magpie	Pica pica	R	8
			Passeriformes	Eurasian Skylark	Alauda arvensis	R, S	1
			Passeriformes	European Greenfinch	Carduelis chloris	S	1
			Passeriformes	Black Redstart	Phoenicurus ochruros	P, S	1
			Passeriformes	House Sparrow	Passer domesticus	R	17
			Passeriformes	Grosbeak	Coccothraustes coccothraustes	S	2
			Passeriformes	Great Tit	Parus major	R, (P)	4
			Passeriformes	Crow	Corvus sp.	n.d.	4
			Passeriformes	Common Raven	Corvus corax	R, (S)	1
			Passeriformes	Eurasian Blackcap	Sylvia atricapilla	S, L	4
			Passeriformes	Common House Martin	Delichon urbicum	L	2
			Passeriformes	Red-backed Shrike	Lanius collurio	L	1
			Passeriformes	Carrion Crow	Corvus corone	R, (S)	68
			Passeriformes	Phoenicurus sp.	Phoenicurus sp.	L or S*	1
			Passeriformes	Barn Swallow	Hirundo rustica	L	2
			Passeriformes	European Robin	Erithacus rubecula	P	1
			Passeriformes	Eurasian Tree Sparrow	Passer montanus	R	14
			Passeriformes	Song Thrush	Turdus philomelos	R, S	1
			Passeriformes	Common Starling	Sturnus vulgaris	R, P, S	8
			Passeriformes	Common Chiffchaff	Phylloscopus collybita	L	2
			Passeriformes	European Pied Flycatcher	Ficedula hypoleuca	L	1
			Passeriformes	Fieldfare	Turdus pilaris	S	2
			Passeriformes	Redwing	Turdus iliacus	S	1
			Pelecaniformes	Grey Heron	Ardea cinerea	R, P, S	14
			Piciformes	Eurasian Green Woodpecker	Picus viridis	R, (P)	11
			Piciformes	Great Spotted Woodpecker	Dendrocopos major	R, P, (S)	10
			Psittaciformes	Grey Parrot	Psittacus erithacus	zoo bird	1
			Psittaciformes	Cockatiel	Nymphicus hollandicus	zoo bird	1
			Psittaciformes	Kea	Nestor notabilis	zoo bird	2
			Strigiformes	Common Barn Owl	Tyto alba	R, P	8
			Strigiformes	Ural owl	Strix uralensis	zoo bird	3
			Strigiformes	Great Grey Owl	Strix nebulosa	zoo bird	3
			Strigiformes	Snowy Owl	Bubo scandiacus	zoo bird	4
			Strigiformes	Eurasian Eagle Owl	Bubo bubo	R	10
			Strigiformes	Eurasian Tawny Owl	Strix aluco	R	10
			Strigiformes	Great Horned Owl	Bubo virginianus	zoo bird	2
			Strigiformes	Northern Long-eared Owl	Asio otus	R, P, S	1
			Strigiformes	Spotted Eagle-owl	Bubo africanus	zoo bird	3
			Strigiformes	Little Owl	Athene noctua	R	1
			Struthioniformes	Common Ostrich	Struthio camelus	zoo bird	1
			Suliformes	Great Cormorant	Phalacrocorax carbo	R, S	1
			Unknown	Unknown spezies	n.d.	n.d.	2
		in total					714
			R = resident species, P = partial migrants, S = short-distance migrants, L = long-distance migrants
			n.d. = not determined
			* depending on species

## Sheet: Suppl_TableS7 
	Supplemental Table S7: Detailed information on the origin of phylogenetically analyzed USUV from wild and captive birds in the live and dead bird monitoring in 2019 and 2020.
	Year	Laboratory No.	GenBank Accession No.	Material for sequencing	Common name	Scientific name	USUV Lineage	Origin (City/ Federal State)
	2019	ED-I-68/19 Nr.1	MZ754010	Pool: brain, liver	Eurasian Blackbird	Turdus merula	Europe 3	Gelnhausen (HE)
	2019	ED-I-74/19	MZ754011	Liver	Eurasian Blackbird	Turdus merula	Europe 3	Wunstorf (NI)
	2019	ED-I-53/20	MZ779075	Liver	Great Grey Owl	Strix nebulosa	Africa 3	Wingst (NI)
	2019	ED-I-64/20	MZ754018	Brain	Eurasian Blackbird	Turdus merula	Africa 3	Bad Nenndorf (NI)
	2019	ED-I-82/19	MZ754004	Brain	Great Grey Owl	Strix nebulosa	Africa 3	Saarbrücken (SL)
	2019	ED-I-121/19 Nr.1	MZ754005	Spleen	Great Grey Owl	Strix nebulosa	Africa 3	Braunschweig (NI)
	2019	ED-I-121/19 Nr.2	MZ560931	Pool: spleen, liver	Great Grey Owl	Strix nebulosa	Africa 3	Braunschweig (NI)
	2019	ED-I-138/19 (VD-2019/55644)	MZ754012	Pool of organs	Eurasian Blackbird	Turdus merula	Europe 2	Großpostwitz (SN)
	2019	ED-I-159/19	MZ754013	Brain	Eurasian Blackbird	Turdus merula	Africa 3	Magdeburg (ST)
	2019	ED-I-171/19	MZ754006	Blood (cruor)	Great Grey Owl	Strix nebulosa	Europe 2	Cottbus-Willmersdorf (BB)
	2019	ED-I-222/19	MZ754015	Brain	Eurasian Blackbird	Turdus merula	Africa 3	Würselen (NW)
	2019	ED-I-223/19	MZ754037	Liver	European Robin	Erithacus rubecula	Africa 3	Herzogenrath (NW)
	2019	ED-I-229/19	MZ754014	Brain	Eurasian Blackbird	Turdus merula	Africa 3	Gießen (HE)
	2019	ED-I-231/20	MZ754016	Brain	Eurasian Blackbird	Turdus merula	Europe 3	Munich (BY)
	2019	ED-I-236/19	MZ754017	Spleen	Eurasian Blackbird	Turdus merula	Africa 3	Löhne (NW)
	2019	ED-I-44/20	MZ754007	Kidney	Great Grey Owl	Strix nebulosa	Africa 3	Passau (BY)
	2019	M 2349	MZ754008	Blood (cruor)	Great Grey Owl	Strix nebulosa	Europe 3	Neuenkirchen (SL)
	2019	M 1827	MZ754019	Blood (cruor)	Eurasian Blackbird	Turdus merula	Europe 3	Berlin (BE)
	2019	VD-2019/66038/3	MZ754038	Pool of organs	Pigeon	Columba sp.	Europe 3	Dresden (SN)
	2019	4119031210/1	MZ754020	Brain	Eurasian Blackbird	Turdus merula	Africa 3	Halle (ST)
	2019	4219032044/1	MZ754021	Brain	Eurasian Blackbird	Turdus merula	Africa 3	Wulkau/Kamern (ST)
	2019	B-10295-19	MZ754022	Brain	Eurasian Blackbird	Turdus merula	Africa 3	Weimar (TH)
	2019	B-11136-19	MZ754023	Brain	Eurasian Blackbird	Turdus merula	Africa 3	Jena (TH)
	2019	B-11341-19	MZ754024	Brain	Eurasian Blackbird	Turdus merula	Africa 3	Mühlhausen (TH)
	2019	B-11386-19	MZ754036	Brain	Trush	Turdus sp.	Europe 3	Gotha (TH)
	2019	B-11590-19	MZ754025	Brain	Eurasian Blackbird	Turdus merula	Africa 3	Dornburg/Camburg (TH)
	2019	B-11847-19	MZ754026	Brain	Eurasian Blackbird	Turdus merula	Africa 3	Eisenach (TH)
	2019	B-12411-19	MZ754027	Brain	Eurasian Blackbird	Turdus merula	Africa 3	Erfurt (TH)
	2019	19 51217-UGF178	MZ754028	Brain	Eurasian Blackbird	Turdus merula	Europe 2	Lebusa (BB)
	2019	19 51217-UGF179	MZ754029	Brain	Eurasian Blackbird	Turdus merula	Europe 2	Thalberg (BB)
	2019	19 51217-UGF184	MZ754030	Brain	Eurasian Blackbird	Turdus merula	Europe 2	Lübben (BB)
	2019	19 51217-UGF187	MZ779076	Brain	Steamer Duck	Tachyeres sp.	Africa 3	Berlin (BE)
	2019	19 51217-UGF194	MZ754031	Brain	Eurasian Blackbird	Turdus merula	Europe 2	Cottbus (BB)
	2019	19 51217-UGF198	MZ754009	Brain	Great Grey Owl	Strix nebulosa	Africa 3	Fürstenwalde (BB)
	2019	19 51217-UGF201	MZ754032	Brain	Eurasian Blackbird	Turdus merula	Africa 3	Golßen (BB)
	2019	19 51217-UGF202	MZ754033	Brain	Eurasian Blackbird	Turdus merula	Africa 3	Booßen (BB)
	2019	191013248	MZ754034	Brain	Eurasian Blackbird	Turdus merula	Europe 3	Mühltal (HE)
	2019	191016985/1	MZ754035	Pool of organs	Eurasian Blackbird	Turdus merula	Africa 3	Kassel (HE)
	2019	V94_19	MZ754066	Skin	Domestic Canary	Serinus canaria forma domestica	Europe 3	Dornhan (BW)
	2019	V95_19	MZ754065	Skin	Domestic Canary	Serinus canaria forma domestica	Europe 3	Dornhan (BW)
	2019	V107_19	MZ754062	Pool of organs	Pin-tailed Parrotfinch	Erythrura prasina	Europe 3	Altenburg (TH)
	2019	V112_19	MZ754064	Feces	Domestic Canary	Serinus canaria forma domestica	Europe 3	Dornhan (BW)
	2019	V1344_19	MZ754063	Liver	Eurasian Blackbird	Turdus merula	Africa 3	Leipzig (SN)
	2020	ED-I-220/20	MZ754041	Brain	Eurasian Blackbird	Turdus merula	Africa 3	Wimmelburg (ST)
	2020	ED-I-232/20	MZ754040	Spleen	Eurasian Blackbird	Turdus merula	Europe 3	Göppingen (BW)
	2020	M 3401	MZ754043	Blood (cruor)	Eurasian Blackbird	Turdus merula	Europe 3	Groß Linden (HE)
	2020	M 3583	MZ754044	Blood (cruor)	Eurasian Blackbird	Turdus merula	Africa 3	Hungen (HE)
	2020	1982	MZ754054	Brain	Bali Starling	Leucopsar rothschildi	Africa 3	Heidelberg (BW)
	2020	VD-2020/58610	MZ754045	Pool of organs	Eurasian Blackbird	Turdus merula	Europe 2	Erlau/ Schweikershain (SN)
	2020	4220027168	MZ754039	Pool of organs	Eurasian Blackbird	Turdus merula	Africa 3	Jessen (ST)
	2020	4220027299	MZ754042	Brain	Eurasian Blackbird	Turdus merula	Africa 3	Lindstedt (ST)
	2020	04-51020-000781	MZ754053	Pool of organs	Eurasian Blackbird	Turdus merula	Africa 3	Nienburg (NI)
	2020	2261	MZ754059	Pool of organs	House Sparrow	Passer domesticus	Europe 3	Heidelberg (BW)
	2020	2440	MZ754057	Pool of organs	Blue Tit	Cyanistes caeruleus	Africa 3	Heilbronn (BW)
	2020	2458	MZ754052	Pool of organs	Eurasian Blackbird	Turdus merula	Europe 3	Fellbach (BW)
	2020	3248	MZ754051	Brain	Eurasian Blackbird	Turdus merula	Europe 3	Pforzheim (BW)
	2020	20 51217-UGF170	MZ754061	Brain	Song Thrush	Turdus philomelos	Europe 2	Guben (BB)
	2020	20 51217-UGF197	MZ754050	Brain	Eurasian Blackbird	Turdus merula	Europe 2	Berlin (BE)
	2020	20 51217-UGF201/2	MZ754055	Brain	Great Grey Owl	Strix nebulosa	Europe 3	Fürstenwalde (BB)
	2020	20 51217-UGF204	MZ754060	Brain	Great Tit	Parus major	Africa 3	Cottbus (BB)
	2020	20 51217-UGF208	MZ754058	Brain	Trush	Turdus sp.	Europe 2	Spremberg (BB)
	2020	20 51217-UGF217	MZ754056	Brain	Blue Tit	Cyanistes caeruleus	Africa 3	Berlin (BE)
	2020	201013632	MZ754049	Pool of organs	Eurasian Blackbird	Turdus merula	Europe 3	Limburg (HE)
	2020	201014447	MZ754048	Pool of organs	Eurasian Blackbird	Turdus merula	Europe 3	Wiesbaden (HE)
	2020	201015295	MZ754047	Brain	Eurasian Blackbird	Turdus merula	Europe 3	Friedberg (HE)
	2020	201015505	MZ754046	Brain	Eurasian Blackbird	Turdus merula	Africa 3	Zwingenberg (HE)
	Abbreviation of the federal states of Germany:
	BB	Berlin Brandenburg
	BE	Berlin
	BW	Baden-Wurttemberg
	BY	Bavaria
	HE	Hesse
	NI	Lower Saxony
	NW	North Rhine-Westphalia
	SL	Saarland
	SN	Saxony
	ST	Saxony-Anhalt
	TH	Thuringia

## Sheet: Suppl_TableS8
	Supplemental Table S8: WNV- and USUV-positive neutralization assay results from wild bird blood samples from regions A–C in 2019.
		Positive neutralization assay results are highlighted in red and bold, cross-reacting antibody titers are also displayed in black.
	Region	ID-Number	Order	Common name	Scientific name	Migration pattern	Housing	WNV antibody titer (ND50)	USUV antibody titer (ND50)
		M 1465	Anseriformes	Northern Mallard Duck	Anas platyrhynchos	R	sentinel station	< 10	30
	A	M 1469	Anseriformes	Northern Mallard Duck	Anas platyrhynchos	R	sentinel station	< 10	30
		M 1582	Anseriformes	Northern Mallard Duck	Anas platyrhynchos	R	sentinel station	< 10	10
		M 1923	Columbiformes	Common Wood Pigeon	Columba palumbus	R, P, S	wild	< 10	20
		M 1967	Passeriformes	Northern House Martin	Delichon urbicum	L	wild	< 10	10
		M 1972	Apodiformes	Common Swift	Apus apus	L	wild	< 10	10
		M 1974	Passeriformes	Eurasian Blue Tit	Cyanistes caeruleus	R	wild	60	240
		M 1698	Accipitriformes	Common Buzzard	Buteo buteo	R, P, S	wild	< 10	30
		M 1754	Pelecaniformes	Grey Heron	Ardea cinerea	R, P, S	wild	< 10	60
		M 2175	Charadriiformes	Black-headed Gull	Larus ridibundus	R, P, S	wild	< 10	20
		M 2184	Accipitriformes	Common Buzzard	Buteo buteo	R, P, S	wild	< 10	20
		M 1560	Accipitriformes	Common Buzzard	Buteo buteo	R, P, S	wild	< 10	10
		M 1555	Accipitriformes	Common Buzzard	Buteo buteo	R, P, S	wild	< 10	50
		M 1804	Passeriformes	Eurasian Blackbird	Turdus merula	R, P	wild	< 10	240
	B	M 2005	Accipitriformes	Common Buzzard	Buteo buteo	R, P, S	wild	< 10	30
		M 2016	Pelecaniformes	Grey Heron	Ardea cinerea	R, P, S	wild	< 10	30
		M 2035	Columbiformes	Feral Pigeon	Columba livia f. domestica	R, (P)	wild	15	120
		M 2064	Pelecaniformes	Grey Heron	Ardea cinerea	R, P, S	wild	< 10	80
		M 1794	Accipitriformes	Western Marsh Harrier	Circus aeruginosus	L	wild	40	< 10
		M 1811	Ciconiiformes	White Stork	Ciconia ciconia	L	wild	60	10
		M 1820	Ciconiiformes	White Stork	Ciconia ciconia	L	wild	40	< 10
		M 1821	Ciconiiformes	White Stork	Ciconia ciconia	L	wild	40	10
		M 1828	Accipitriformes	Northern Goshawk	Accipiter gentilis	R, P	wild	480	80
		M 1834	Accipitriformes	Northern Goshawk	Accipiter gentilis	R, P	wild	240	20
		M 1838	Accipitriformes	Northern Goshawk	Accipiter gentilis	R, P	wild	640	15
		M 1839	Accipitriformes	Northern Goshawk	Accipiter gentilis	R, P	wild	1280	40
		M 1840	Accipitriformes	Northern Goshawk	Accipiter gentilis	R, P	wild	1920	40
		M 1841	Accipitriformes	Northern Goshawk	Accipiter gentilis	R, P	wild	240	< 10
		M 1842	Accipitriformes	Northern Goshawk	Accipiter gentilis	R, P	wild	480	30
		M 1843	Accipitriformes	Northern Goshawk	Accipiter gentilis	R, P	wild	640	40
		M 1846	Accipitriformes	Northern Goshawk	Accipiter gentilis	R, P	wild	640	10
		M 1847	Accipitriformes	Northern Goshawk	Accipiter gentilis	R, P	wild	480	40
		M 1850	Accipitriformes	Northern Goshawk	Accipiter gentilis	R, P	wild	5120	100
		M 1851	Passeriformes	Hooded Crow	Corvus corone cornix	R, (S)	wild	960	< 10
		M 1859	Accipitriformes	Northern Goshawk	Accipiter gentilis	R, P	wild	≥ 3840	30
		M 1862	Accipitriformes	Northern Goshawk	Accipiter gentilis	R, P	wild	1920	20
		M 2012	Accipitriformes	Northern Goshawk	Accipiter gentilis	R, P	wild	320	10
		M 2018	Strigiformes	Northern Long-eared Owl	Asio otus	R, P, S	wild	60	< 10
		M 2021	Columbiformes	Common Wood Pigeon	Columba palumbus	R, P, S	wild	640	80
		M 2025	Columbiformes	Common Wood Pigeon	Columba palumbus	R, P, S	wild	60	10
		M 2030	Accipitriformes	Eurasian Sparrowhawk	Accipiter nisus	R, P, S	wild	320	10
		M 2062	Accipitriformes	Northern Goshawk	Accipiter gentilis	R, P	wild	960	10
		M 2065	Columbiformes	Common Wood Pigeon	Columba palumbus	R, P, S	wild	15	< 10
		M 2099	Strigiformes	Eurasian Tawny Owl	Strix aluco	R	wild	960	80
		M 2091	Galliformes	Common Pheasant	Phasianus colchicus	R	wild	< 10	30
	C	M 1391	Passeriformes	Eurasian Jay	Garrulus glandarius	R, P	wild	15	400
		M 1473	Passeriformes	Eurasian Blackbird	Turdus merula	R, P	wild	15	60
		M 1599	Passeriformes	Barn Swallow	Hirundo rustica	L	wild	< 10	40
		M 1602	Accipitriformes	Harris’s Hawk	Parabuteo unicinctus	zoo bird	captive	< 10	30
		M 1670	Passeriformes	Eurasian Blackbird	Turdus merula	R, P	wild	< 10	60
		M 1671	Accipitriformes	Common Buzzard	Buteo buteo	R, P, S	wild	< 10	60
		M 1674	Passeriformes	Eurasian Blackbird	Turdus merula	R, P	wild	20	480
		M 2286	Columbiformes	Pigeon	Columba sp.	R, (P)	wild	< 10	10
		M 2289	Columbiformes	Common Wood Pigeon	Columba palumbus	R, P, S	wild	< 10	10
		M 2308	Passeriformes	Eurasian Blackbird	Turdus merula	R, P	wild	< 10	30
		M 2327	Passeriformes	Eurasian Blackbird	Turdus merula	R, P	wild	120	1920
		M 2350	Passeriformes	Eurasian Blackbird	Turdus merula	R, P	wild	15	60
		M 2368	Falconiformes	European Kestrel	Falco tinnunculus	R, P, S	wild	< 10	10
		M 2394	Accipitriformes	Common Buzzard	Buteo buteo	R, P, S	wild	< 10	20
		M 2395	Passeriformes	Carrion Crow	Corvus corone	R, (S)	wild	< 10	15
		M 2550	Strigiformes	Northern Long-eared Owl	Asio otus	R, P, S	wild	< 10	60
		M 2566	Strigiformes	Little Owl	Athene noctua	R	wild	< 10	15
		M 2579	Accipitriformes	Steller`s Sea Eagle	Haliaeetus pelagicus	zoo bird	captive	< 10	20
		M 2609	Accipitriformes	Rüppell`s Vulture	Gyps rueppelli	zoo bird	captive	< 10	40
		M 1409	Ciconiiformes	White Stork	Ciconia ciconia	L	wild	60	15
		M 1451	Falconiformes	European Kestrel	Falco tinnunculus	R, P, S	wild	120	20
		M 1493	Falconiformes	European Kestrel	Falco tinnunculus	R, P, S	wild	160	60
		M 1495	Ciconiiformes	Black Stork	Ciconia nigra	L	wild	80	20
		M 1506	Falconiformes	European Kestrel	Falco tinnunculus	R, P, S	wild	240	20
		M 2340	Falconiformes	European Kestrel	Falco tinnunculus	R, P, S	wild	15	< 10
		R = resident species, P = partial migrants, S = short-distance migrants, L = long-distance migrants

## Sheet: Suppl_TableS9
	Supplemental Table S9: WNV- and USUV-positive neutralization assay results from wild bird blood samples from regions A–C in 2020.
		Positive neutralization assay results are highlighted in red and bold, cross-reacting antibody titers are also displayed in black.
	Region	ID-Number	Order	Common name	Scientific name	Migration pattern	Housing	WNV antibody titer (ND50)	USUV antibody titer (ND50)
		M 3056	Columbiformes	Common Wood Pigeon	Columba palumbus	R, P, S	wild	< 10	60
	A	M 3076	Passeriformes	Eurasian Jay	Garrulus glandarius	R, P	wild	< 10	40
		M 3083	Columbiformes	Common Wood Pigeon	Columba palumbus	R, P, S	wild	< 10	15
		M 3098	Columbiformes	Common Wood Pigeon	Columba palumbus	R, P, S	wild	< 10	15
		M 4935	Columbiformes	Common Wood Pigeon	Columba palumbus	R, P, S	wild	< 10	20
		M 4938	Strigiformes	Eurasian Tawny Owl	Strix aluco	R	wild	< 10	120
		M 4954	Columbiformes	Common Wood Pigeon	Columba palumbus	R, P, S	wild	10	40
		M 2205	Columbiformes	Feral Pigeon	Columba livia f. domestica	R, (P)	wild	< 10	20
		M 2208	Accipitriformes	Common Buzzard	Buteo buteo	R, P, S	wild	< 10	10
		M 2218	Anseriformes	Northern Mallard Duck	Anas platyrhynchos	R, P, S	wild	< 10	10
		M 3245	Passeriformes	Eurasian Blackbird	Turdus merula	R, P	wild	20	80
		M 3258	Passeriformes	Eurasian Blackbird	Turdus merula	R, P	wild	< 10	80
		M 3286	Passeriformes	Eurasian Blackbird	Turdus merula	R, P	wild	< 10	15
		M 3290	Pelecaniformes	Grey Heron	Ardea cinerea	R, P, S	wild	60	960
		M 3021	Passeriformes	Carrion Crow	Corvus corone	R, (S)	wild	< 10	80
		M 3054	Strigiformes	Northern Long-eared Owl	Asio otus	R, P, S	wild	80	< 10
		M 2855	Accipitriformes	Common Buzzard	Buteo buteo	R, P, S	wild	< 10	30
	B	M 2867	Falconiformes	European Kestrel	Falco tinnunculus	R, P, S	wild	20	80
		M 2880	Strigiformes	Eurasian Tawny Owl	Strix aluco	R	wild	60	480
		M 2923	Strigiformes	Northern Long-eared Owl	Asio otus	R, P, S	wild	< 10	10
		M 2932	Passeriformes	Common Magpie	Pica pica	R	wild	< 10	15
		M 2964	Columbiformes	Common Wood Pigeon	Columba palumbus	R, P, S	wild	30	240
		M 2979	Columbiformes	Common Wood Pigeon	Columba palumbus	R, P, S	wild	100	1920
		M 2981	Columbiformes	Common Wood Pigeon	Columba palumbus	R, P, S	wild	15	160
		M 3700	Passeriformes	Great Tit	Parus major	R, (P)	wild	30	≥ 120
		M 3726	Columbiformes	Common Wood Pigeon	Columba palumbus	R, P, S	wild	< 10	10
		M 3734	Columbiformes	Common Wood Pigeon	Columba palumbus	R, P, S	wild	< 10	30
		M 3757	Columbiformes	Common Wood Pigeon	Columba palumbus	R, P, S	wild	< 10	15
		M 3760	Columbiformes	Common Wood Pigeon	Columba palumbus	R, P, S	wild	30	160
		M 3762	Passeriformes	Eurasian Jay	Garrulus glandarius	R, P	wild	20	1280
		M 3769	Strigiformes	Eurasian Tawny Owl	Strix aluco	R	wild	40	120
		M 3777	Columbiformes	Common Wood Pigeon	Columba palumbus	R, P, S	wild	< 10	40
		M 3801	Passeriformes	Eurasian Blackbird	Turdus merula	R, P	wild	80	640
		M 3814	Columbiformes	Common Wood Pigeon	Columba palumbus	R, P, S	wild	240	320
		M 3819	Columbiformes	Common Wood Pigeon	Columba palumbus	R, P, S	wild	< 10	160
		M 2862	Passeriformes	Eurasian Blackbird	Turdus merula	R, P	wild	80	< 10
		M 2874	Accipitriformes	Northern Goshawk	Accipiter gentilis	R, P	wild	2560	15
		M 2892	Accipitriformes	Northern Goshawk	Accipiter gentilis	R, P	wild	320	10
		M 2902	Columbiformes	Common Wood Pigeon	Columba palumbus	R, P, S	wild	40	< 10
		M 2911	Accipitriformes	Northern Goshawk	Accipiter gentilis	R, P	wild	60	< 10
		M 2929	Accipitriformes	Northern Goshawk	Accipiter gentilis	R, P	wild	60	< 10
		M 2947	Accipitriformes	Common Buzzard	Buteo buteo	R, P, S	wild	15	< 10
		M 2950	Accipitriformes	Northern Goshawk	Accipiter gentilis	R, P	wild	320	15
		M 2970	Columbiformes	Common Wood Pigeon	Columba palumbus	R, P, S	wild	20	< 10
		M 3699	Accipitriformes	Northern Goshawk	Accipiter gentilis	R, P	wild	480	< 10
		M 3704	Accipitriformes	Northern Goshawk	Accipiter gentilis	R, P	wild	480	< 10
		M 3706	Accipitriformes	Northern Goshawk	Accipiter gentilis	R, P	wild	1280	20
		M 3710	Accipitriformes	Northern Goshawk	Accipiter gentilis	R, P	wild	160	15
		M 3711	Accipitriformes	Northern Goshawk	Accipiter gentilis	R, P	wild	60	< 10
		M 3712	Columbiformes	Common Wood Pigeon	Columba palumbus	R, P, S	wild	10	< 10
		M 3713	Accipitriformes	Northern Goshawk	Accipiter gentilis	R, P	wild	80	< 10
		M 3717	Passeriformes	Hooded Crow	Corvus corone cornix	R, (S)	wild	1920	20
		M 3718	Accipitriformes	Northern Goshawk	Accipiter gentilis	R, P	wild	640	< 10
		M 3721	Accipitriformes	Northern Goshawk	Accipiter gentilis	R, P	wild	1280	15
		M 3729	Accipitriformes	Northern Goshawk	Accipiter gentilis	R, P	wild	1920	15
		M 3731	Passeriformes	Hooded Crow	Corvus corone cornix	R, (S)	wild	20	< 10
		M 3732	Falconiformes	European Kestrel	Falco tinnunculus	R, P, S	wild	240	30
		M 3740	Columbiformes	Common Wood Pigeon	Columba palumbus	R, P, S	wild	120	< 10
		M 3743	Accipitriformes	Northern Goshawk	Accipiter gentilis	R, P	wild	280	< 10
		M 3745	Accipitriformes	Northern Goshawk	Accipiter gentilis	R, P	wild	1920	< 10
		M 3752	Columbiformes	Common Wood Pigeon	Columba palumbus	R, P, S	wild	10	< 10
		M 3754	Accipitriformes	Northern Goshawk	Accipiter gentilis	R, P	wild	1280	30
		M 3770	Falconiformes	European Kestrel	Falco tinnunculus	R, P, S	wild	10	< 10
		M 3782	Accipitriformes	Northern Goshawk	Accipiter gentilis	R, P	wild	2560	10
		M 3796	Accipitriformes	Common Buzzard	Buteo buteo	R, P, S	wild	80	< 10
		M 3798	Accipitriformes	Northern Goshawk	Accipiter gentilis	R, P	wild	≥ 3840	20
		M 3803	Strigiformes	Northern Long-eared Owl	Asio otus	R, P, S	wild	80	< 10
		M 3805	Accipitriformes	Northern Goshawk	Accipiter gentilis	R, P	wild	960	< 10
		M 3810	Accipitriformes	Eurasian Sparrowhawk	Accipiter nisus	R, P, S	wild	40	< 10
		M 3811	Columbiformes	Common Wood Pigeon	Columba palumbus	R, P, S	wild	60	< 10
		M 3813	Accipitriformes	Northern Goshawk	Accipiter gentilis	R, P	wild	≥ 120	< 10
		M 3817	Passeriformes	Common Magpie	Pica pica	R	wild	80	< 10
		M 3821	Accipitriformes	Northern Goshawk	Accipiter gentilis	R, P	wild	960	20
		M 3844	Accipitriformes	Common Buzzard	Buteo buteo	R, P, S	wild	< 10	480
	C	M 2423	Pelecaniformes	Grey Heron	Ardea cinerea	R, P, S	wild	< 10	20
		M 2466	Passeriformes	Common Chaffinch	Fringilla coelebs	R, P	wild	< 10	15
		M 2476	Falconiformes	European Kestrel	Falco tinnunculus	R, P, S	wild	< 10	40
		M 2497	Strigiformes	Eurasian Eagle Owl	Bubo bubo	R	wild	< 10	10
		M 2524	Strigiformes	Great Grey Owl	Strix nebulosa	zoo bird	captive	20	240
		M 3387	Passeriformes	Common Magpie	Pica pica	R	wild	< 10	30
		M 3396	Columbiformes	Common Wood Pigeon	Columba palumbus	R, P, S	wild	< 10	60
		M 3401	Passeriformes	Eurasian Blackbird	Turdus merula	R, P	wild	< 10	40
		M 3432	Columbiformes	Common Wood Pigeon	Columba palumbus	R, P, S	wild	< 10	20
		M 3442	Strigiformes	Eurasian Eagle Owl	Bubo bubo	R	wild	< 10	80
		M 3530	Columbiformes	Common Wood Pigeon	Columba palumbus	R, P, S	wild	10	30
		M 3534	Passeriformes	Eurasian Blackbird	Turdus merula	R, P	wild	< 10	80
		M 3579	Columbiformes	Common Wood Pigeon	Columba palumbus	R, P, S	wild	< 10	15
		M 3592	Passeriformes	Eurasian Blackbird	Turdus merula	R, P	wild	10	30
		M 3628	Passeriformes	Eurasian Blackcap	Sylvia atricapilla	S, L	wild	< 10	20
		M 3662	Columbiformes	Feral Pigeon	Columba livia f. domestica	R, (P)	wild	< 10	20
		M 4683	Accipitriformes	Griffon Vulture	Gyps fulvus	zoo bird	captive	< 10	10
		M 2650	Columbiformes	Common Wood Pigeon	Columba palumbus	R, P, S	wild	15	160
		M 2677	Columbiformes	Common Wood Pigeon	Columba palumbus	R, P, S	wild	< 10	30
		M 2731	Columbiformes	Common Wood Pigeon	Columba palumbus	R, P, S	wild	< 10	30
		M 2736	Columbiformes	Common Wood Pigeon	Columba palumbus	R, P, S	wild	< 10	60
		M 2763	Columbiformes	Common Wood Pigeon	Columba palumbus	R, P, S	wild	< 10	30
		M 2467	Accipitriformes	Bateleur Eagle	Terathopius ecaudatus	zoo bird *	captive	30	d < 1:10
		M 2490	Accipitriformes	European Honey Buzzard	Pernis apivorus	L	wild	15	d < 1:10
		M 3524	Falconiformes	European Kestrel	Falco tinnunculus	R, P, S	wild	60	d 1:10
		M 3555	Accipitriformes	White-backed Vulture	Gyps africanus	zoo bird *	captive	30	d < 1:10
		M 3611	Psittaciformes	Kea	Nestor notabilis	zoo bird	captive	160	d < 1:10
		M 3612	Psittaciformes	Kea	Nestor notabilis	zoo bird	captive	240	d < 1:10
		M 3625	Falconiformes	European Kestrel	Falco tinnunculus	R, P, S	wild	40	d < 1:10
		M 3641	Falconiformes	Saker Falcon	Falco cherrug	falconry bird	captive	960	d 1:10
		R = resident species, P = partial migrants, S = short-distance migrants, L = long-distance migrants
		zoo bird * = where a recently contact to WNV antibodies from Africa or Mediterrenean countries with WNV in endemic areas cannot bei excluded

## Sheet: Suppl_TableS10
	Supplemental Table S10: Investigation of WNV and USUV antibody positive reference and bird sera by blocking ELISA (INgezim West Nile Compac) and VNT.
	Samples were considered positive by blocking ELISA when the inhibition percentage (IP) was ≥ 40% and doubtful by IP > 30% to < 40 % and IP ≤ 30% as negative.
	FLI ID number		Ingezim ELISA:		confirmation by virus neutralization tests (VNT):
	WNV Ab positive sera	species	inhibition percentage (IP%)	b ELISA result	WNV ND50	USUV ND50
	Huhn 194	Chicken	85.9174	positive	500	n.t.
	Huhn 195	Chicken	92.2245	positive	250	n.t.
	Huhn 197	Chicken	92.1089	positive	900	n.t.
	Ente 220	Duck	87.8136	positive	80	n.t.
	P 1646	Horse	94.7104	positive	320	n.t.
	P 1648	Horse	94.6641	positive	240	n.t.
	P 924	Horse	94.1727	positive	80	n.t.
	P 1020	Horse	91.4672	positive	40	n.t.
	M 1309	European Kestrel	88.7777	positive	160	40
	M 456	Eurasian Hobby	91.3613	positive	30	< 10
	M 389	Carrion Crow	87.0092	positive	40	< 10
	M 372	Western Marsh Harrier	88.1664	positive	20	< 10
	USUV Ab positive sera	species
	Kn OM 433_a	Rabbit	92.6697	positive	n.t.	1280
	Kn OM 433_b	Rabbit	92.5845	positive	n.t.	2560
	Kn OM 440 _a	Rabbit	87.8714	positive	n.t.	80
	Kn OM 440_b	Rabbit	86.8861	positive	n.t.	120
	M 1359	Eurasian Eagle Owl	51.5374	positive	< 10	10
	M 757	Eurasian Eagle Owl	39.2162	doubtful	< 10	15
	M 756	Eurasian Eagle Owl	44.4377	positive	< 10	20
	M 755	Eurasian Eagle Owl	70.5474	positive	< 10	30
	M 808	Common Buzzard	48.7313	positive	< 10	40
	M 765	Nothern Long-eared Owl	89.8884	positive	20	80
	M 1366	Ural Owl	87.7358	positive	10	120
	M 770	Eurasian Tawny Owl	75.5759	positive	10	160
	M 1374	Eurasian Tawny Owl	76.9527	positive	10	160
	M 1237	Common Starling	68.8669	positive	40	240
	M 1377	Common Magpie	80.3364	positive	< 10	240
	M 762	Ural Owl	80.7116	positive	30	320
	M 759	Snowy Owl	72.1553	positive	< 10	640
	M 1375	Eurasian Tawny Owl	79.7439	positive	40	640
	M 1363	Snowy Owl	73.7662	positive	40	960
	M 771	Eurasian Tawny Owl	80.9157	positive	60	2560
	M 1312	Northern Mallard Duck	10.91	negative	< 10	10
	M 1903	Common Magpie	72.99	positive	< 10	40
	M 1361	Eurasian Eagle Owl	69.8364	positive	< 10	< 10
	M 1879	Eurasian Eagle Owl	54.47	positive	< 10	40
	M 1880	Eurasian Eagle Owl	46.45	positive	< 10	< 10
	M 1881	Eurasian Eagle Owl	48.55	positive	< 10	< 10
	M 1886	Ural Owl	63.45	positive	< 10	15
	M 1894	Eurasian Tawny Owl	73.59	positive	< 10	60
	M 1895	Eurasian Tawny Owl	75.03	positive	15	640
	M 1897	Northern Hawk Owl	90.08	positive	< 10	100
						n.t. not tested
